# Supplementary material for: Cyclin-Dependent Kinase 5 Contributes to Bruton’s Tyrosine Kinase Inhibitor Resistance via the IRE1α/XBP1 Axis in Mantle Cell Lymphoma
Source: Research Square preprint supplement (doi:10.21203/rs.3.rs-9500406/v1), 2026-05-08
Supplement: Supplementary file 1 [file 7f0bb74f243875587faeb689.pdf]

## **SUPPLEMENTAL MATERIALS and METHODS**

### **Cell culture**

The number of passages between thawing and use in the described experiments ranged between two and five. Cell line authenticity was confirmed by STR-based analysis (Laragen Inc). Mycoplasma testing was performed regularly (every 2 months) using Mycoplasma PCR detection kit (ABM, Canada).

For chase experiments MCL cell lines were seeded at  $1 \times 10^6$ /ml in the presence of 100  $\mu$ g/ml of Cycloheximide and cultured up to 12h. Following treatment cells were lysed and used for immunoblotting.

For stimulation with soluble factors, MCL cell lines were seeded at  $1.5 \times 10^6$ /ml in the presence of 5  $\mu$ g/ml of soluble goat F(ab')<sub>2</sub> anti-human IgM antibody (sol-IgM; Sothern Biotech, Birmingham, AL, USA) or 25 ng/mL soluble human FABB (sol-BAFF; Cell signaling Technology, Danvers, MA, USA). Following stimulation cells were lysed and used for immunoblotting.

MCL primary samples were cultured on BAFF-expressing or CD40-L expressing mouse fibroblasts cells as previously described.<sup>1-3</sup> Briefly, stroma cells were seeded to achieve 80-90% confluence, after 24 hours MCL cells were plated at a 10:1 ratio and incubated for another 24 hours.

### **Gene expression manipulation and cell line generation**

Gene knockdown plasmids were delivered using lentiviruses. HEK293T cells (ATCC) were co-transfected with Lipofectamine 2000, psPAX2 and pMD2.G packaging plasmids (Addgene) and pLKO.1-based MISSION® Lentiviral shRNA (Sigma Aldrich) to produce lentiviral particles. Target cells were transduced with lentivirus and control knockdown cells were transduced with pLKO.1 empty vector-containing lentivirus. Cells were selected at 48 hours post-transduction for 7 days with up to 10  $\mu$ M puromycin.

Gene overexpression utilized CRISPR activation in a two-step protocol. Following the above description, CRISPRa dCas9-VPR (Horizon Discovery) lentiviral particles were produced using

HEK293T cells co-transfection and Mino and JeKo-1 cell lines were transduced. Cells were selected at 48 hours post-transduction for 14 days with blasticidin to establish Mino dCas9-VPR and JeKo-1 dCas9-VPR CRISPRa ready cell lines. sgRNA lentiviral particles were produced using sgRNA lentiviral plasmids (Horizon Discovery) HEK293T cells co-transfection as described above. sgRNA lentivirus was transduced to Mino dCas9-VPR and JeKo-1 dCas9-VPR cells. Target cells were selected at 48 hours post-transduction for 7 days with up to 10  $\mu$ M puromycin.

### **Cell viability testing**

To measure cell proliferation, cells were plated in 96-wellplates (10,000 cells/well, 3 wells/sample) with drugs and incubated for 72 h at 37 °C in 5% CO<sub>2</sub>. After incubation, relative numbers of viable cells were measured using a tetrazolium-based colorimetric assay (CellTiter Aqueous One Solution Cell Proliferation Assay, Promega) on the SpectraMax iD3 (Molecular Devices).

Apoptosis was measured using the ApoScreen Annexin V (Southern Biotech). Briefly, cells were resuspended in 250  $\mu$ L Annexin V binding buffer containing 2.5  $\mu$ L Annexin V-APC and 2.5  $\mu$ L 7-aminoactinomycin D (7-AAD). Cells were then analyzed by flow cytometry.

### **Quantitative PCR**

Total RNA was extracted using Homogenizer Mini Columns and the total RNA Kit I (Omega Bio-Tek). Complementary DNA (cDNA) was synthesized using qScript cDNA Supermix (QuantaBio), then was prepared according to the manufacturer's recommendations using PerfeCTaFastMix II (Quantabio). *CDK5* TaqMan probe (Hs00358991\_g1) and reference probe (*GAPDH* Hs02758991\_g1) from ThermoFisher Scientific were used. *XBPIs* mRNA levels were quantified using spliced-variant specific primers described in van Schadewijk, *et al*<sup>4</sup>: XBPI-F (5'- TGCTGAGTCCGCAGCAGGTG-3') and XBPI-R (5'- GCTGGCAGGCTCTGGGGAAG-3') and normalized against *GAPDH*: GAPDH-F (5' – AATCCCATCACCATCTTCCA – 3') and GAPDH-R (5' – TGGACTCCACGACGAACTCA – 3'). PowerUp SYBR Green Master Mix for

qPCR (ThermoFisher Scientific, USA). Experiments were carried out in triplicates. The comparative Ct method was used for analysis ( $2^{-\Delta\Delta Ct}$ , where  $\Delta\Delta Ct = \Delta Ct_P - \Delta Ct_K$ ; P = probe and K = reference sample).

## **Transcriptomics**

For bulk RNA sequencing, JeKo-1, JeKo-1-IR, JeKo-1 CDK5-OE and JeKo-1-IR CDK5-KD were collected and RNA was isolated as described above. RNA integrity and quality were evaluated using the Agilent 2100 Bioanalyzer (#5067-1511, Agilent Technologies). Library prep and sequencing was performed on an Illumina HiSeq 2500 through City of Hope's Integrative Genomics Core.

Data was exported and analyzed using Partek flow (<https://www.partek.com/>). Briefly, Fastq files were trimmed, then aligned to the human reference genome (h38) using STAR (v.2.7.8.) and finally counts were normalized. Up/downregulated genes were defined by statistical significance ( $P_{adj} < 0.05$ ). Gene set enrichment analysis was performed using GSEA (v.4.3.3.) under Hallmark.

Somatic mutations in the drug-resistant cell line was performed following strategy of the Integrated Mutation Analysis Pipeline for RNA-seq data <sup>5</sup> with the matched control before drug treatment. In brief, the reads were first trimmed by Trimmomatic with "ILLUMINACLIP:TruSeq3-PE.fa:2:30:10 SLIDINGWINDOW:4:15 MINLEN:36" option and aligned with STAR which was followed by coordinate sorting with samtools sort. Duplicates were marked and removed by MarkDuplicates in GATK, which was followed by reads splitting with SplitNCigarReads and base recalibration with BaseRecalibrator and ApplyBQSR. Mutations were then called by Mutect2 with germline source from gnomAD and panel of normal from 1000 Genomes and artifacts were filtered with FilterMutectCalls using the learned orientation priors and Mutect2 call statistics. The alignment was further filtered to keep only reads overlapping candidate variant sites using Samtools and GATK FilterSamReads. And the reads were extracted by Samtools and remapped with HISAT2. The mutations were called again with Mutect2 following reads splitting by SplitNCigarReads and filtered by a custom script to remove mutations within a suite of RNA-editing and artifact blacklists, including TCGA PON,

RADAR, DARNED, RNA-EDI databases, and HLA, immunoglobulin, and pseudogene regions. The final mutations were then annotated with Funcotator and VEP and mutations with less than 4 supporting reads or 10 total reads or lower than 4% allele frequency were removed. Potential germline mutations with over 1% frequency in dbSNPs and gnomAD were removed and only functionally relevant variants: missense, nonsense, frameshift, splice-site, and in-frame indels were kept. Finally, cross-reference filtered variants against COSMIC was performed to flag known cancer-associated mutations and functional impact was predicted by SIFT and PolyPhen. For primary MCL tumors RNA sequencing, 5 normal samples (B cells enriched from PBMCs from healthy donors) and 58 MCL samples were used. Descriptive methods can be found at Yi et al.<sup>6</sup>. For the survival curve MCL samples were stratified in two groups based on the mean CDK5 expression (above-mean vs below-mean expression) and the difference in survival was evaluated using a log-rank test.

## **Proteomics**

For proteomics assays 300 µg from JeKo-1, JeKo-1-IR, JeKo-1 CDK5-OE and JeKo-1-IR CDK5-KD were processed using urea denaturation and Lys-C/trypsin dual digestion. 40 µg of peptides from each sample was labeled with distinct TMTpro tags. Peptides from different samples were pooled after checking labeling efficiencies and processed using SMOAC phosphopeptide enrichment protocol. The TiO<sub>2</sub> and IMAC fraction from SMOAC were kept separate and half of each fraction was loaded on a 50 cm C18 column. Flow-through from the SMOAC protocol was subjected to offline high pH RP-fractionation. Peptides were fractionated into 96 fractions and then condensed to final 12 fractions for MS analysis. An estimated 2 µg peptides from each of the twelve global fractions were cleaned using Thermo C18 Spin Tips and 500 ng peptides per fraction was loaded on column for global proteomics. Mass spectrometry data was acquired on the Thermo Orbitrap Eclipse mass spectrometer equipped with a FAIMS Pro interface. Each peptide fraction was separated using 120-minute LC gradient on a 50 cm C18 EasySpray column. Phosphoproteomics and global proteomics data was acquired with FAIMS TMT-MS2 workflow.

Raw spectra were analyzed through Proteome Discoverer v.s.2.4 and normalized using Internal Reference Scaling-Sample Loading (IRS-SL) method in R (v.3.6.). Deep expression proteins were identified using the Mascot v2.7. search engine and phosphopeptides were identified using Byonic (v4.0.12.). Kinase activity profiling was determined using IKAP or KSEA. Statistical significance was defined as  $P_{adj} < 0.05$ .

Data obtained by Dr. Patrick Pirrote's group (Integrative Mass spectrometry at Tgen and COH)

### **Immunoblotting**

Cells were lysed in lysis buffer (20 mM Tris, 150 mM NaCl, 1 % NP-40, 1 mM NaF, 1 mM sodium phosphate, 1 mM  $\text{NaVO}_3$ , 1 mM EDTA, 1 mM EGTA), supplemented with protease inhibitor cocktail (Roche), phosphatase inhibitor cocktail 2 (Sigma-Aldrich) and 1 mM phenylmethylsulfonyl fluoride. Protein quantification in cell lysates was measured using Pierce BCA protein Assay kit (ThermoFisher). Primary antibodies used in Western blot analysis and secondary horseradish peroxidase-conjugated anti-mouse and anti-rabbit were purchased from Cell Signaling Technology and Novus Biologicals (**Supplemental Table 1**). Protein bands were developed using SuperSignal West Femto Maximum Sensitivity Substrate (ThermoFisher Scientific) according to kit instructions. In each case, a representative of 3 independent experiments is shown. Densitometry was performed using ImageJ/Fiji software to quantify band intensities and results were normalized to the loading control. In the case of pIRE1 $\alpha$ , after normalization to the loading control, the ratio of the phosphorylated protein to its corresponding total protein was calculated.

### **Co-Immunoprecipitation**

Whole cell lysates were pre-cleared with beads for 45min at room temperature and then incubated at 4 °C overnight with 2  $\mu\text{g}$  of pull-down antibody (CDK5, BTK or Ire1 $\alpha$ ) or rabbit IgG isotype control. Pierce Protein A Magnetic Beads (25  $\mu\text{L}$ , ThermoFisher Scientific) were added to lysates and samples were incubated for 1h at room temperature. Beads were washed 3

times in cell lysis buffer (see Immunoblotting) and subjected to immunoblotting. 10% source protein was used as input control.

### **In vivo MCL model**

All mouse care and experiment were conducted in accordance with established institutional guidance and approved protocols of the Institutional Animal Care and Use Committee at City of Hope. 5-week old NOD.Cg-Prkdcscid Il2rgtm1Wjl/Sz (NSG; The Jaxon Laboratories) mice were pre-conditioned with 25 mg/kg of busulfan via intraperitoneal injection (I.P.). The following day,  $1 \times 10^6$  JeKo-1 or JeKo-1 CDK5-OE cells were inoculated via tail vein injection (I.V.). Circulating MCL cells were detected using CD19-BV395 and CD5-PECy7 antibodies by flow cytometry. Mice were monitored for survival and euthanized when the human endpoints were met.

### **Statistical analysis**

At least 3 biological replicates were used in all experiments shown throughout the manuscript, unless noted otherwise. Error bars represent standard error of the mean (SEM) unless otherwise indicated. Statistical analysis was performed with Student t test or one-way ANOVA with Tukey's multiple comparisons test, when indicated. For survival, Kaplan-Meier analysis with Logrank (Mantel-Cox) was used. All analysis was performed in GraphPad Prism software.

\* $p < 0.05$ , \*\* $p < 0.01$  and \*\*\* $p < 0.001$  throughout the manuscript.

1. Godbersen JC, Humphries LA, Danilova OV, Kebbekus PE, Brown JR, Eastman A, et al. The Nedd8-activating enzyme inhibitor MLN4924 thwarts microenvironment-driven NF- $\kappa$ B activation and induces apoptosis in chronic lymphocytic leukemia B cells. *Clin Cancer Res* 2014 Mar 15; **20**(6): 1576-1589.
2. Puente XS, Jares P, Campo E. Chronic lymphocytic leukemia and mantle cell lymphoma: crossroads of genetic and microenvironment interactions. *Blood* 2018 May 24; **131**(21): 2283-2296.

3. Paiva C, Rowland TA, Sreekantham B, Godbersen C, Best SR, Kaur P, et al. SYK inhibition thwarts the BAFF - B-cell receptor crosstalk and thereby antagonizes Mcl-1 in chronic lymphocytic leukemia. *Haematologica* 2017 Nov; **102**(11): 1890-1900.
4. van Schadewijk A, van't Wout EF, Stolk J, Hiemstra PS. A quantitative method for detection of spliced X-box binding protein-1 (XBP1) mRNA as a measure of endoplasmic reticulum (ER) stress. *Cell Stress Chaperones* 2012 Mar; **17**(2): 275-279.
5. Tang G, Liu X, Cho M, Li Y, Tran DH, Wang X. Pan-cancer discovery of somatic mutations from RNA sequencing data. *Commun Biol* 2024 May 23; **7**(1): 619.
6. Yi S, Yan Y, Jin M, Bhattacharya S, Wang Y, Wu Y, et al. Genomic and transcriptomic profiling reveals distinct molecular subsets associated with outcomes in mantle cell lymphoma. *J Clin Invest* 2022 Feb 1; **132**(3).

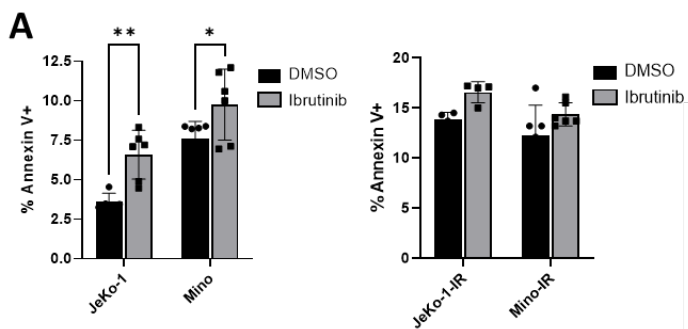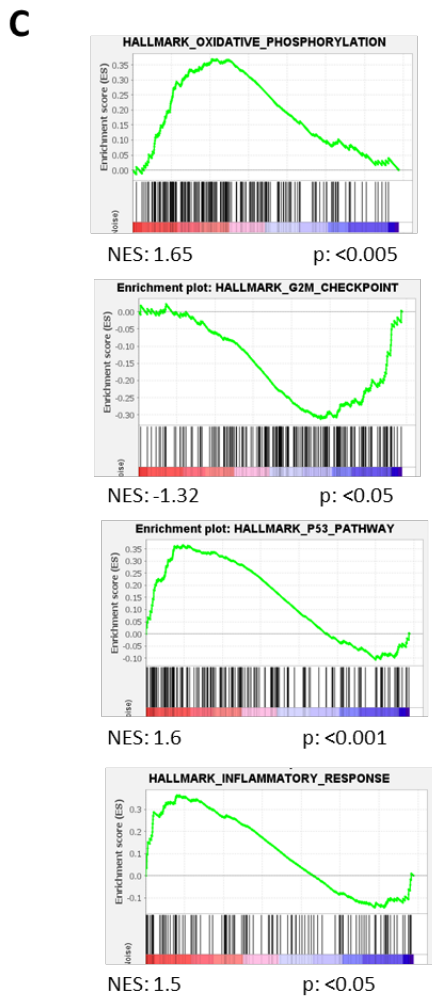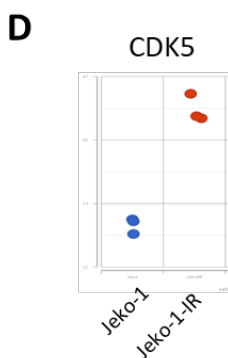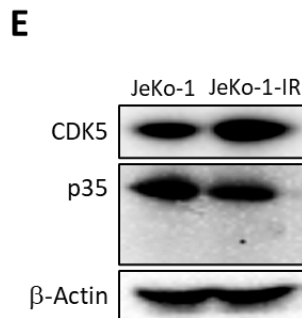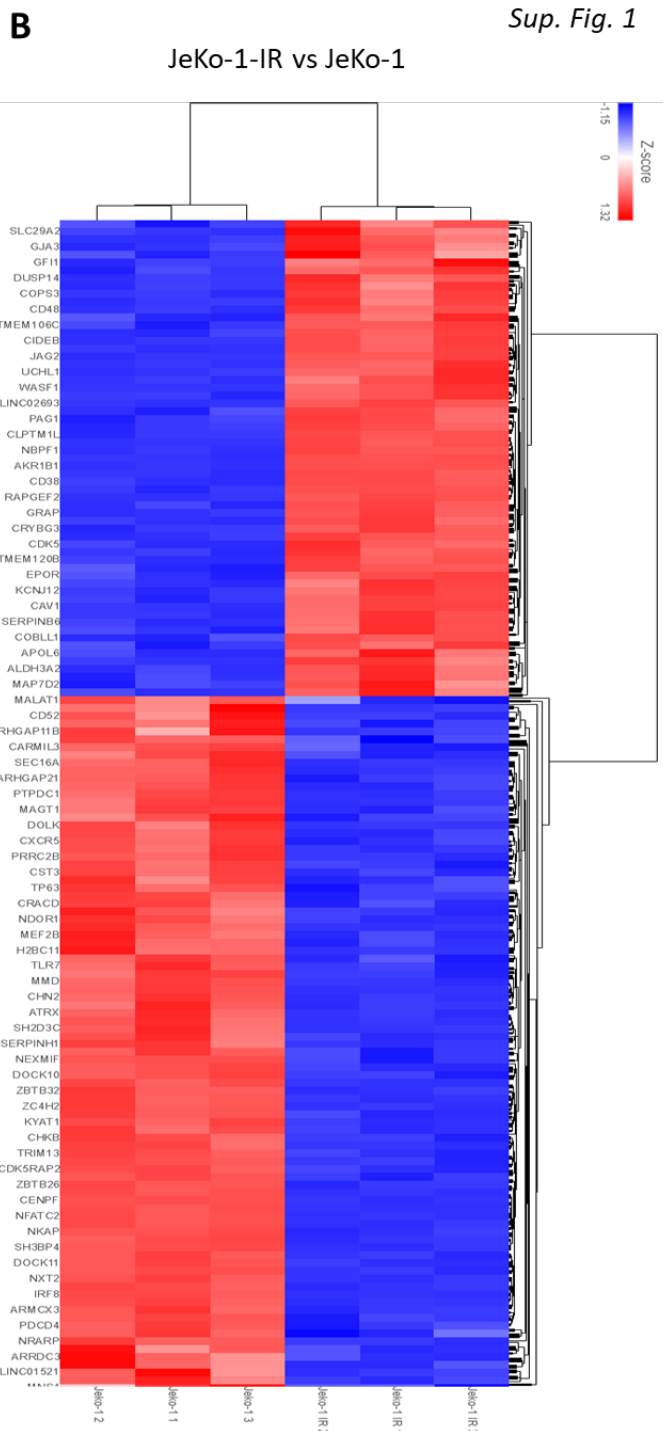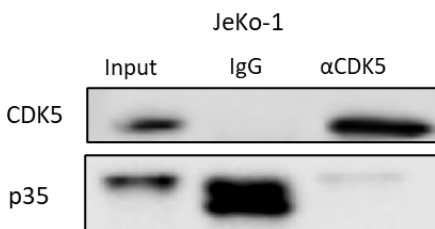

**Supplemental Figure 1. RNA-Seq results of Acquired Ibrutinib Resistance models**

(A) Ibrutinib-resistant vs. parental cell lines treated with ibrutinib (5  $\mu$ M for JeKo-1, 1  $\mu$ M for Mino) or vehicle control for 48 hours. Apoptosis was measured by Annexin V (n=4-6).

(B) Heat map for JeKo-1 and JeKo-1-IR.

(C) GSEA enrichment plots of RNA-Seq results for JeKo-1-IR vs JeKo-1.

(D) Principal component analysis for CDK5 in JeKo-1 and JeKo-1-IR model (n=3).

(E) Immunoblot of CDK5, p35 and  $\beta$ -actin protein levels in a representative experiment in JeKo-1 and JeKo-1-IR models (left) and pull down of CDK5 and Co-IP with p35 in JeKo-1 (right panel). Representative experiment.

Data are mean  $\pm$  SEM, \*p<0.05 and \*\*p<0.01.

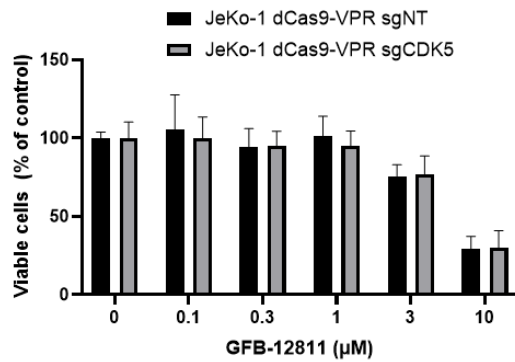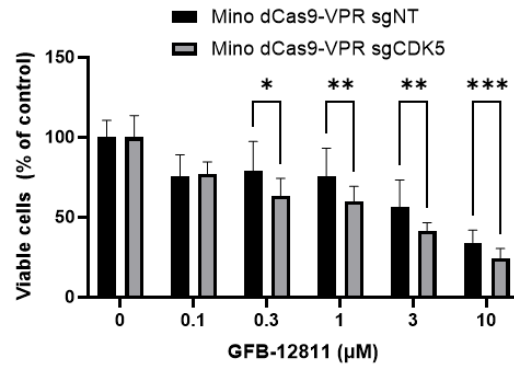

### Supplemental Figure 2. CDK5 inhibitor effects in CDK5-OE cells

CDK5 overexpressing vs control cells were treated with GFB-12811 or vehicle control for 72h; proliferation was measured by colorimetric MTS assay (n=6-9).

Data are mean  $\pm$  SEM. \*\*p<0.05, \*\*p<0.01 and \*\*\*p<0.001.

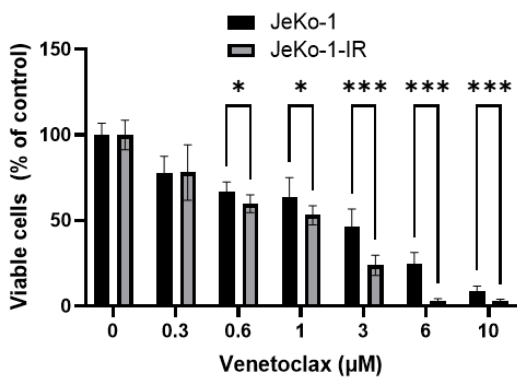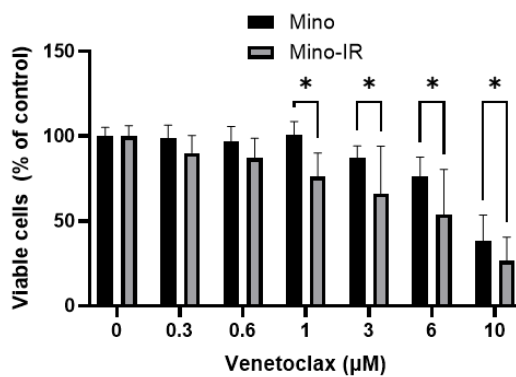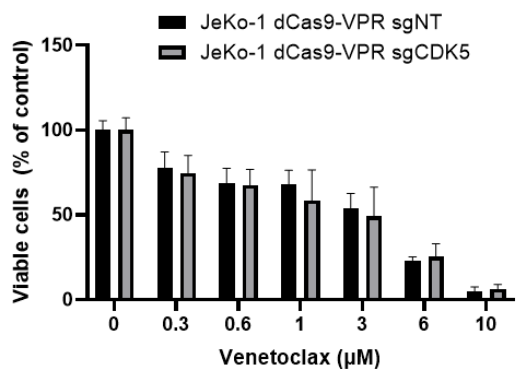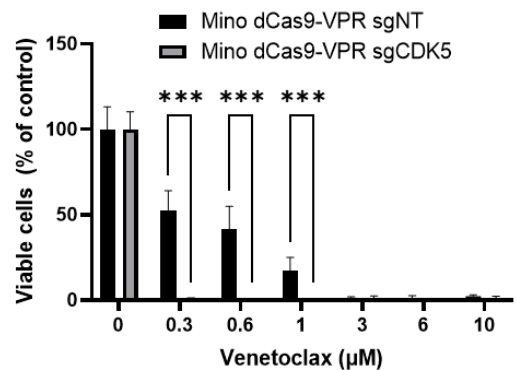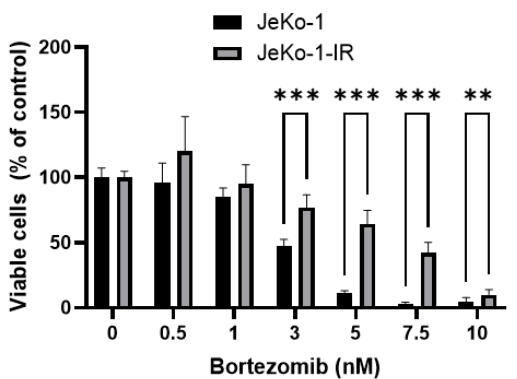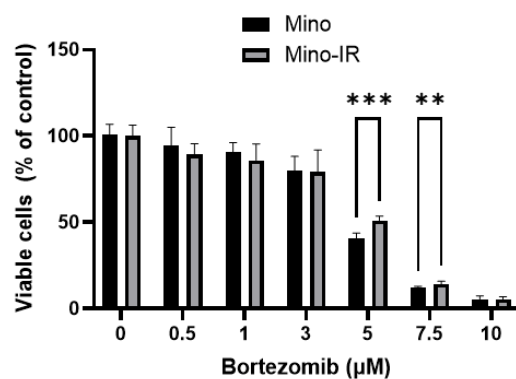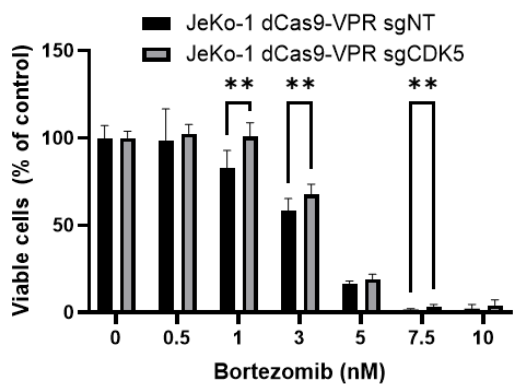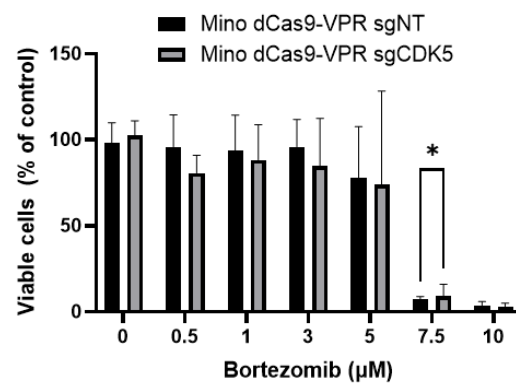

### **Supplemental Figure 3. CDK5 and resistance to venetoclax and bortezomib**

(A) Ibrutinib resistant and parental cell lines (top panels) and CDK5-overexpressing and control cells (bottom panels) were treated with venetoclax or vehicle control for 72h; proliferation was measured by colorimetric MTS assay (n=6-9).

(B) Ibrutinib resistant and parental cell lines (top panels) and CDK5-overexpressing and control cells (bottom panels) were treated with bortezomib or vehicle control for 72h; proliferation was measured by colorimetric MTS assay (n=6-9).

Data are mean  $\pm$  SEM. \*\*p<0.05, \*\*\*p<0.001 and \*\*\*\*p<0.0001.

A

## JeKo-1 sgCDK5 (OE) vs JeKo-1 sgNT

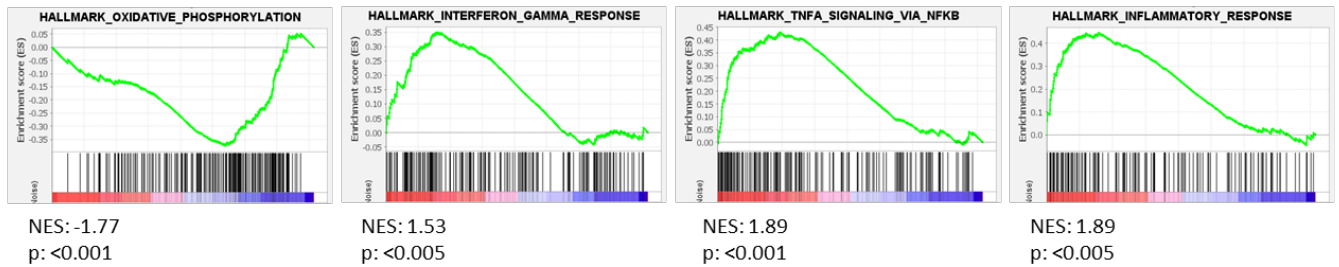

B

## JeKo-1-IR CDK5-KD vs JeKo-1-IR pLKO.1

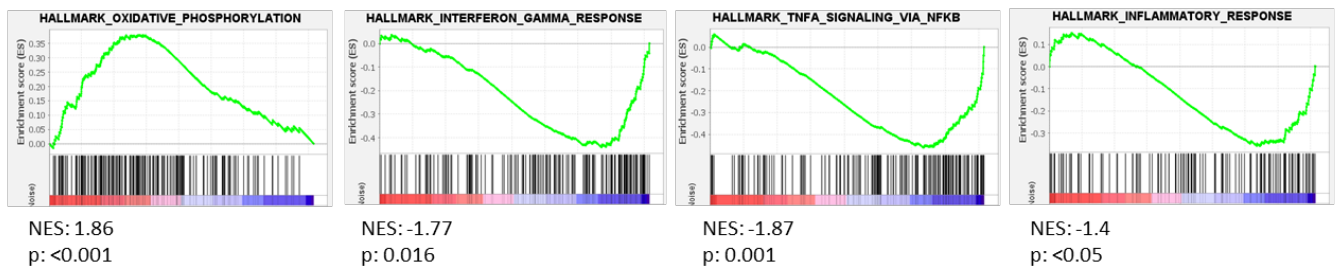

C

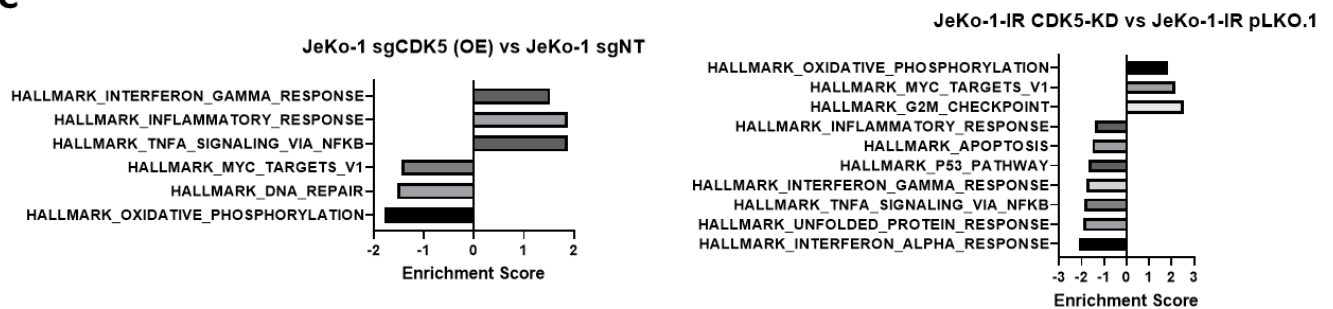

## Supplemental Figure 4. RNA-seq in MCL cell lines after CDK5 manipulation

(A-B) GSEA enrichment plots of RNA-Seq results for: (top) JeKo-1 CDK5-overexpressing vs control cells gCDK5 (OE) and (bottom) Jeko-1-IR CDK5-KD vs control cells.

(C) GSEA Hallmark Pathway analysis JeKo-1-IR vs parental and Jeko-1-IR CDK5-KD vs control cells. Showing top significantly enriched pathways ranked by NES (normalized enrichment score) (n=3).

A

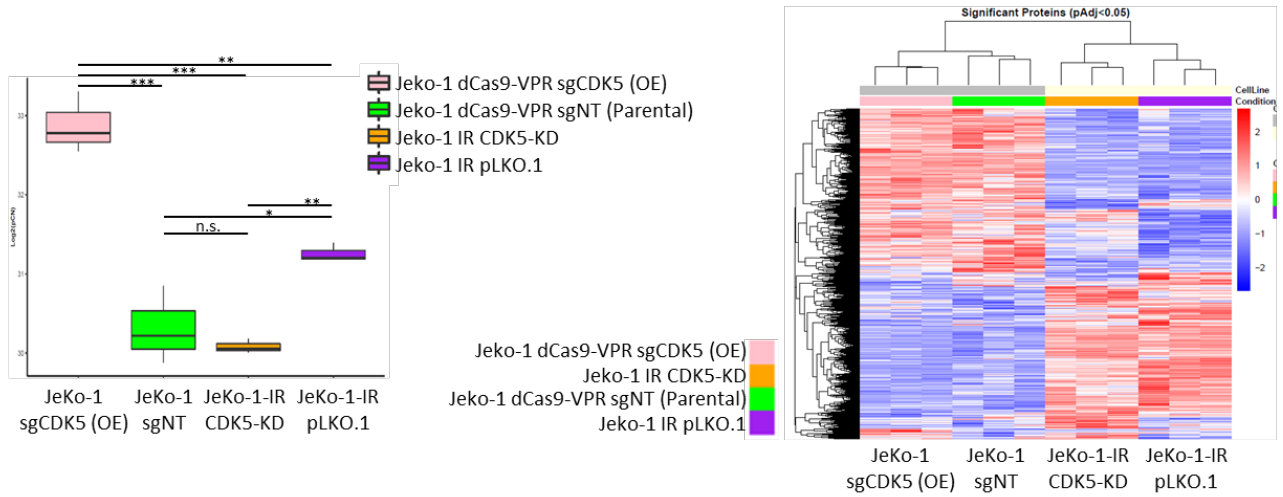

B

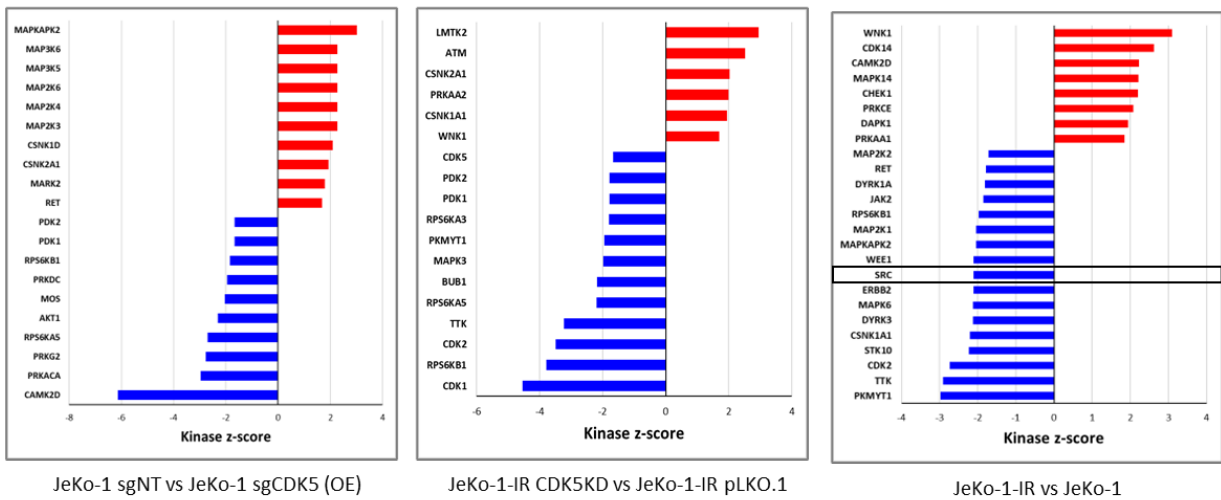

**Supplemental Figure 5. Proteomics analysis in JeKo-1 models**

(A) CDK5 protein abundance in global proteomics analysis and heat map of differential protein expression in JeKo-1 parental, IR and with CDK5 manipulation.

(B) Kinase-substrate enrichment analysis (KSEA) in JeKo-1 models: Left panel: parental vs IR model, middle panel: control vs CDK5 overexpression, right panel: IR vs IR CDK5-KD (n=3). Padj<0.05.

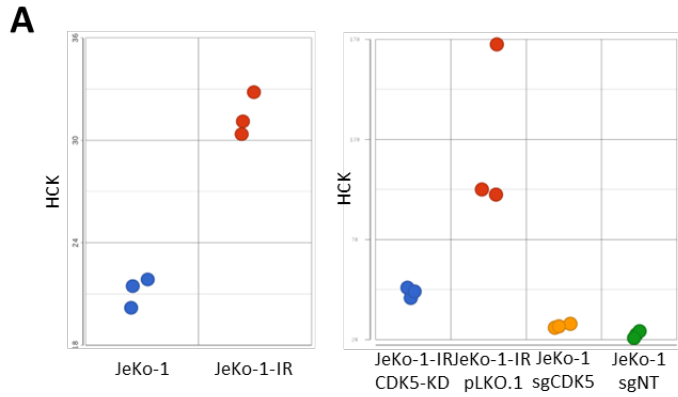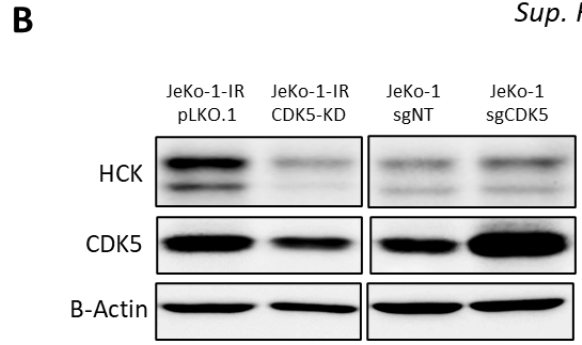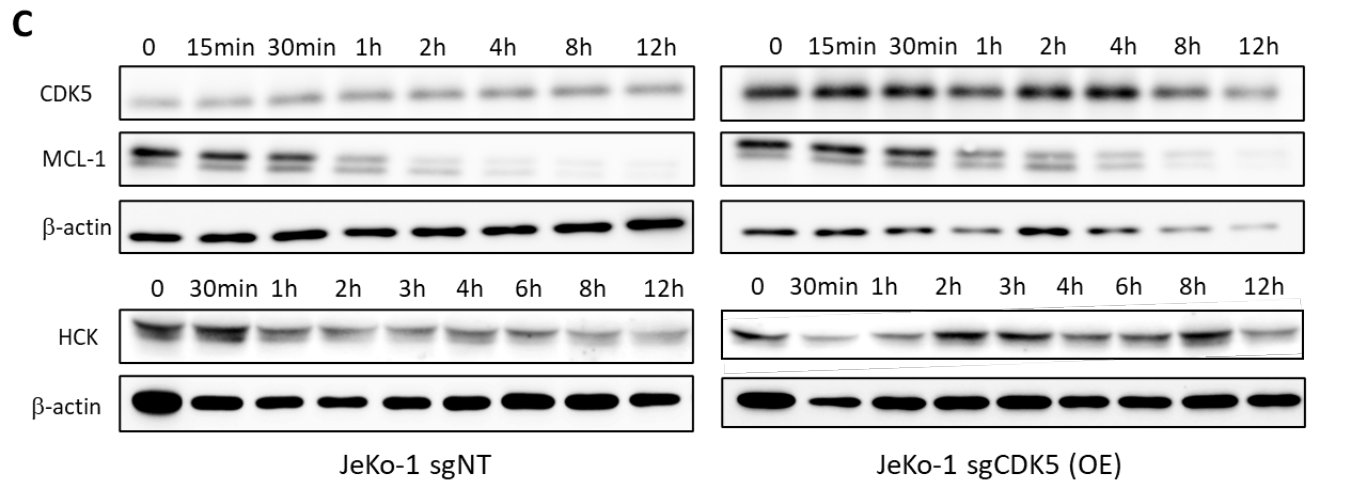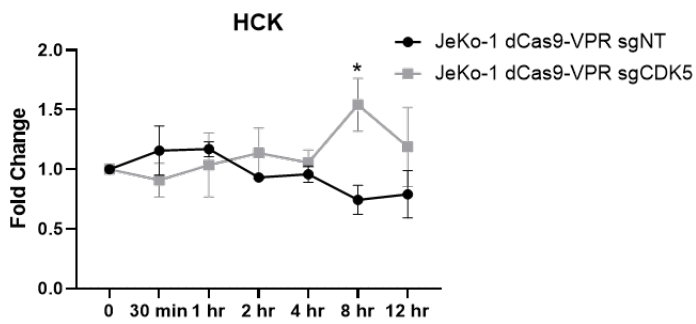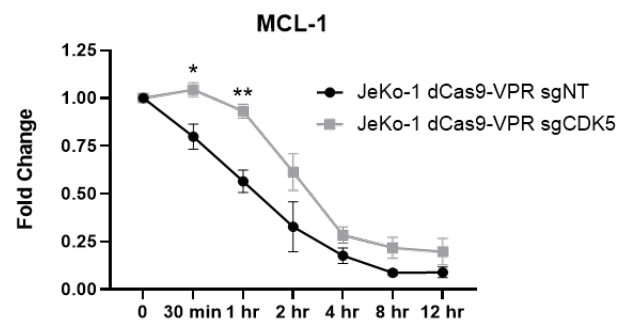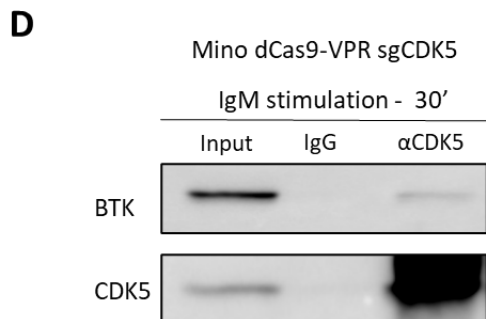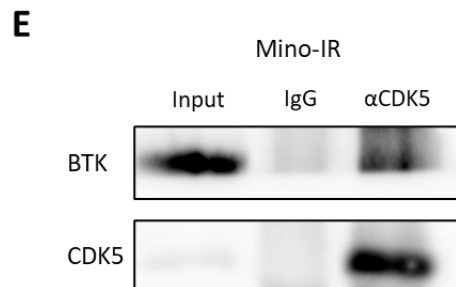

### **Supplemental Figure 6. Src kinases in Ibrutinib resistance**

(A) Principal component analysis for HCK in JeKo-1 models: parental vs IR (left panel), control vs CDK5 overexpression, IR vs IR-CDK5-KD (right panel) (n=3).

(B) Protein lysates from JeKo-1 cells with manipulated CDK5 were subjected for immunoblotting. A representative blot of 3 independent experiments is shown.

(C) Protein lysates from JeKo-1 CDK5 overexpressing and control cells from ciclohexamide experiments were subjected for immunoblotting (top panels; representative blot of 3 independent experiments is shown) and summary quantification (bottom panels).

(D) Protein lysates from Mino CDK5 overexpressing cells were subjected to CDK5 immunoprecipitation experiment after 30' of IgM stimulation. A representative blot of 3 independent experiments is shown.

(E) Protein lysates from Mino-IR cells were subjected to CDK5 immunoprecipitation experiment. A representative blot of 3 independent experiments is shown.

Data are mean  $\pm$  SEM. \*\*p<0.05 and \*\*\*p<0.01.

**Supplemental Table 1. List of Antibodies**

| <b>Antibody</b>        | <b>Clone</b>    | <b>Cat. #</b> | <b>Company</b>    |
|------------------------|-----------------|---------------|-------------------|
| <b>Immunoblotting</b>  |                 |               |                   |
| AKT                    |                 | 9272          | Cell signaling    |
| B-actin                | 13E5            | 4970          | Cell signaling    |
| BTK                    | D3H5            | 8547          | Cell signaling    |
| BTK                    | D6T2C           | 56044         | Cell signaling    |
| CDK5                   | D1F7M           | 14145         | Cell signaling    |
| CDK5                   | 1H3             | 12134         | Cell signaling    |
| ERK                    |                 | 9102          | Cell signaling    |
| GAPDH                  | 14C10           | 2118          | Cell signaling    |
| HCK                    | E117F           | 14643         | Cell signaling    |
| Ire1 $\alpha$          | 14C10           | 3294          | Cell signaling    |
| MCL-1                  | D2W9E           | 94296         | Cell signaling    |
| p35/P25                | C64B10          | 2680          | Cell signaling    |
| PCL $\gamma$ 2         |                 | 3872          | Cell signaling    |
| p-AKT                  | S473            | 4058          | Cell signaling    |
| p-BTK                  | Y223            | 5082          | Cell signaling    |
| p-ERK                  | T202/Y204       | 9101          | Cell signaling    |
| p-Ire1 $\alpha$        | Ser724          | NB100-2323    | Novus Biologicals |
| p-PCL $\gamma$ 2       | Y1217           | 3871          | Cell signaling    |
| p-Src family           | Tyr-416 / E6G4R | 59458         | Cell signaling    |
| Vinculin               | E1E9V           | 13901         | Cell signaling    |
| Xbp1s                  | E9V3E           | 40435         | Cell signaling    |
|                        |                 |               |                   |
| <b>Flow cytometry</b>  |                 |               |                   |
| CD45-PERCPCy5.5        | 564105          | HI30          | BD biosciences    |
| CD19-BV395             | 302298          | HIB19         | Biolegend         |
| CD5-PECy7              | 571696          | UCHT2         | BD Biosciences    |
| Live/Dead Fixable aqua |                 | L34965        | ThermoFisher      |

**Supplemental Table 2. List of acquired mutations in JeKo1-IR**

| JeKo-1 vs JeKo-1-IR |          |       |           |           |        |          |         |         |         |          |       |
|---------------------|----------|-------|-----------|-----------|--------|----------|---------|---------|---------|----------|-------|
| Sample              | Gene     | chr   | start     | end       | strand | mutClass | mutType | refBase | varBase | AAC      | MAF   |
| Jeko1_D             | VPS13D   | chr1  | 12244275  | 12244275  | +      | MISSENSE | SNP     | C       | A       | p.P69T   | 0.231 |
| Jeko1_D             | ALDH4A1  | chr1  | 18883304  | 18883304  | -      | MISSENSE | SNP     | T       | C       | p.N193S  | 0.291 |
| Jeko1_D             | SNIP1    | chr1  | 37552706  | 37552706  | -      | MISSENSE | SNP     | C       | G       | p.S89T   | 0.073 |
| Jeko1_D             | SETDB1   | chr1  | 150961094 | 150961094 | +      | MISSENSE | SNP     | A       | T       | p.E1011V | 0.202 |
| Jeko1_D             | RAB3GAP2 | chr1  | 220190402 | 220190402 | -      | MISSENSE | SNP     | T       | C       | p.N536D  | 0.386 |
| Jeko1_D             | HLX      | chr1  | 220880359 | 220880359 | +      | MISSENSE | SNP     | G       | A       | p.A168T  | 0.056 |
| Jeko1_D             | KLHL29   | chr2  | 23642756  | 23642756  | +      | MISSENSE | SNP     | T       | G       | p.N282K  | 0.251 |
| Jeko1_D             | TTC27    | chr2  | 32630679  | 32630679  | +      | MISSENSE | SNP     | C       | T       | p.T82I   | 0.095 |
| Jeko1_D             | BCL11A   | chr2  | 60461284  | 60461284  | -      | MISSENSE | SNP     | A       | T       | p.L543Q  | 0.06  |
| Jeko1_D             | DQX1     | chr2  | 74522605  | 74522605  | -      | MISSENSE | SNP     | C       | A       | p.M490I  | 0.345 |
| Jeko1_D             | TMEM237  | chr2  | 201626057 | 201626057 | -      | MISSENSE | SNP     | C       | G       | p.L376F  | 0.114 |
| Jeko1_D             | TLR10    | chr4  | 38774177  | 38774177  | -      | MISSENSE | SNP     | T       | A       | p.N472Y  | 0.067 |
| Jeko1_D             | GEMIN5   | chr5  | 154891346 | 154891346 | -      | MISSENSE | SNP     | C       | T       | p.R1386Q | 0.328 |
| Jeko1_D             | FAM193B  | chr5  | 177536604 | 177536604 | -      | MISSENSE | SNP     | A       | T       | p.L277Q  | 0.066 |
| Jeko1_D             | TBP      | chr6  | 170562157 | 170562157 | +      | MISSENSE | SNP     | T       | A       | p.S141T  | 0.19  |
| Jeko1_D             | AKAP9    | chr7  | 92096783  | 92096783  | +      | MISSENSE | SNP     | A       | T       | p.Q3275L | 0.619 |
| Jeko1_D             | MNX1     | chr7  | 157010047 | 157010047 | -      | MISSENSE | SNP     | C       | T       | p.G102S  | 0.06  |
| Jeko1_D             | IMPAD1   | chr8  | 56964040  | 56964040  | -      | MISSENSE | SNP     | T       | A       | p.D278V  | 0.437 |
| Jeko1_D             | PDP1     | chr8  | 93923359  | 93923359  | +      | MISSENSE | SNP     | G       | A       | p.G434S  | 0.313 |
| Jeko1_D             | AGTPBP1  | chr9  | 85578939  | 85578939  | -      | MISSENSE | SNP     | C       | A       | p.C1068F | 0.106 |
| Jeko1_D             | MTPAP    | chr10 | 30322404  | 30322404  | -      | MISSENSE | SNP     | T       | G       | p.L402F  | 0.224 |
| Jeko1_D             | BTA1F1   | chr10 | 92027197  | 92027197  | +      | MISSENSE | SNP     | A       | G       | p.Q1768R | 0.219 |
| Jeko1_D             | TAF5     | chr10 | 103368429 | 103368429 | +      | MISSENSE | SNP     | T       | G       | p.L147R  | 0.102 |
| Jeko1_D             | RASGRP2  | chr11 | 64742110  | 64742110  | -      | MISSENSE | SNP     | C       | A       | p.D26Y   | 0.298 |
| Jeko1_D             | SORL1    | chr11 | 121496922 | 121496922 | +      | MISSENSE | SNP     | C       | A       | p.P271H  | 0.296 |
| Jeko1_D             | LRMP     | chr12 | 25004487  | 25004487  | +      | MISSENSE | SNP     | C       | T       | p.P49L   | 0.333 |
| Jeko1_D             | LETMD1   | chr12 | 51059366  | 51059366  | +      | NONSENSE | SNP     | G       | T       | p.E353*  | 0.149 |
| Jeko1_D             | ZBTB39   | chr12 | 57004533  | 57004533  | -      | MISSENSE | SNP     | C       | A       | p.A129S  | 0.089 |
| Jeko1_D             | SYNE2    | chr14 | 64126773  | 64126773  | +      | MISSENSE | SNP     | T       | A       | p.L4579Q | 0.103 |
| Jeko1_D             | SYNE3    | chr14 | 95417852  | 95417852  | -      | MISSENSE | SNP     | G       | A       | p.R968C  | 0.094 |
| Jeko1_D             | TSC2     | chr16 | 2065607   | 2065607   | +      | MISSENSE | SNP     | C       | G       | p.A563G  | 0.21  |
| Jeko1_D             | NFATC2IP | chr16 | 28954607  | 28954607  | +      | MISSENSE | SNP     | C       | T       | p.S168F  | 0.199 |
| Jeko1_D             | LMNB2    | chr19 | 2431598   | 2431598   | -      | MISSENSE | SNP     | C       | T       | p.E591K  | 0.27  |
| Jeko1_D             | MYO9B    | chr19 | 17195126  | 17195126  | +      | MISSENSE | SNP     | A       | T       | p.E1233D | 0.064 |
| Jeko1_D             | RIMBP3   | chr22 | 18607144  | 18607144  | -      | MISSENSE | SNP     | G       | C       | p.P1431A | 0.102 |
| Jeko1_D             | CHCHD10  | chr22 | 23767547  | 23767547  | -      | MISSENSE | SNP     | A       | T       | p.S30T   | 0.129 |
| Jeko1_D             | RAB9A    | chrX  | 13709188  | 13709188  | +      | MISSENSE | SNP     | T       | C       | p.Y148H  | 0.052 |

**Supplemental Table3. List of acquired mutations in Mino-IR**

| Sample | Gene      | Mino vs Mino-IR |          |          |        |          |         |         |         |          |       |
|--------|-----------|-----------------|----------|----------|--------|----------|---------|---------|---------|----------|-------|
|        |           | chr             | start    | end      | strand | mutClass | mutType | refBase | varBase | AAC      | MAF   |
| Mino_D | HECTD3    | chr1            | 45007567 | 45007567 | -      | MISSENSE | SNP     | C       | T       | p.R450H  | 0.078 |
| Mino_D | UTP25     | chr1            | 2.1E+08  | 2.1E+08  | +      | MISSENSE | SNP     | G       | C       | p.E689Q  | 0.086 |
| Mino_D | ZNF672    | chr1            | 2.49E+08 | 2.49E+08 | +      | MISSENSE | SNP     | G       | T       | p.D39Y   | 0.11  |
| Mino_D | TMEM214   | chr2            | 27034111 | 27034111 | +      | MISSENSE | SNP     | A       | G       | p.N66D   | 0.068 |
| Mino_D | ASNSD1    | chr2            | 1.9E+08  | 1.9E+08  | +      | MISSENSE | SNP     | G       | C       | p.V480L  | 0.131 |
| Mino_D | ASNSD1    | chr2            | 1.9E+08  | 1.9E+08  | +      | MISSENSE | SNP     | T       | C       | p.S482P  | 0.112 |
| Mino_D | GOLGA4    | chr3            | 37326948 | 37326948 | +      | MISSENSE | SNP     | G       | C       | p.V1688L | 0.4   |
| Mino_D | CENPU     | chr4            | 1.85E+08 | 1.85E+08 | -      | MISSENSE | SNP     | A       | G       | p.L263P  | 0.149 |
| Mino_D | RASA1     | chr5            | 87268820 | 87268820 | +      | MISSENSE | SNP     | G       | C       | p.L123F  | 0.125 |
| Mino_D | CTNNA1    | chr5            | 1.39E+08 | 1.39E+08 | +      | MISSENSE | SNP     | G       | C       | p.G53A   | 0.159 |
| Mino_D | TCOF1     | chr5            | 1.5E+08  | 1.5E+08  | +      | MISSENSE | SNP     | C       | T       | p.A143V  | 0.058 |
| Mino_D | CYFIP2    | chr5            | 1.57E+08 | 1.57E+08 | +      | MISSENSE | SNP     | G       | C       | p.A437P  | 0.057 |
| Mino_D | OARD1     | chr6            | 41070096 | 41070096 | -      | MISSENSE | SNP     | C       | T       | p.G36R   | 0.079 |
| Mino_D | ZNF292    | chr6            | 87257117 | 87257117 | +      | MISSENSE | SNP     | G       | A       | p.S1163N | 0.067 |
| Mino_D | CAPZA2    | chr7            | 1.17E+08 | 1.17E+08 | +      | MISSENSE | SNP     | G       | C       | p.A105P  | 0.153 |
| Mino_D | ZNF212    | chr7            | 1.49E+08 | 1.49E+08 | +      | MISSENSE | SNP     | C       | T       | p.H334Y  | 0.143 |
| Mino_D | RASSF4    | chr10           | 44993322 | 44993322 | +      | MISSENSE | SNP     | C       | T       | p.A320V  | 0.081 |
| Mino_D | TAPBPL    | chr12           | 6458803  | 6458803  | +      | MISSENSE | SNP     | C       | T       | p.L355F  | 0.2   |
| Mino_D | EEF1AKMT1 | chr13           | 20757571 | 20757571 | -      | MISSENSE | SNP     | G       | T       | p.P10T   | 0.545 |
| Mino_D | MTHFS     | chr15           | 79889222 | 79889222 | -      | MISSENSE | SNP     | G       | A       | p.R113W  | 0.086 |
| Mino_D | FANCI     | chr15           | 89306145 | 89306145 | +      | NONSENSE | SNP     | T       | G       | p.L1103* | 0.101 |
| Mino_D | IGF1R     | chr15           | 98913247 | 98913247 | +      | MISSENSE | SNP     | A       | T       | p.K598M  | 0.097 |
| Mino_D | ROGDI     | chr16           | 4797748  | 4797748  | -      | MISSENSE | SNP     | A       | G       | p.V263A  | 0.13  |
| Mino_D | THRA      | chr17           | 40083961 | 40083961 | +      | MISSENSE | SNP     | G       | A       | p.A117T  | 0.081 |
| Mino_D | MEX3C     | chr18           | 51177112 | 51177112 | -      | MISSENSE | SNP     | A       | G       | p.F237L  | 0.106 |
| Mino_D | SHKBP1    | chr19           | 40590285 | 40590285 | +      | MISSENSE | SNP     | C       | T       | p.A544V  | 0.1   |
| Mino_D | CEP250    | chr20           | 35502836 | 35502836 | +      | MISSENSE | SNP     | A       | C       | p.L1489F | 0.067 |
| Mino_D | PRAF2     | chrX            | 49073882 | 49073882 | -      | MISSENSE | SNP     | G       | A       | p.R36C   | 0.105 |
