# Supplementary material for: Cyclin-Dependent Kinase 5 Contributes to Bruton’s Tyrosine Kinase Inhibitor Resistance via the IRE1α/XBP1 Axis in Mantle Cell Lymphoma
Source: Research Square preprint supplement (doi:10.21203/rs.3.rs-9500406/v1), 2026-05-08
Supplement: Supplementary file 1 [file 0533bd5c6bb93c34f36c97ec.xlsx]

## Sheet: Table1
	Table 1. List of genes Upregulated in JeKo-1 CDK5-OE and Downregulated in JeKo-1-IR CDK5-KD
	Common genes Upregulated in JeKo-1 CDK5-OE and Downregualted in JeKo-1-IR CDK5-KD
	CDK5
	FYN
	BTBD3
	PRPH
	NIBAN1
	SLC26A11
	SRPK3
	TNFRSF4
	NEU4
	DENND6B
