# Supplementary material for: Cyclin-Dependent Kinase 5 Contributes to Bruton’s Tyrosine Kinase Inhibitor Resistance via the IRE1α/XBP1 Axis in Mantle Cell Lymphoma
Source: Research Square preprint supplement (doi:10.21203/rs.3.rs-9500406/v1), 2026-05-08
Supplement: Supplementary file 2 [file c70458a19999e294faf5af67.xlsx]

## Sheet: Table 2
	Table 2. Significant phosphosites in CDK5-manipulated cell lines
		# of Phosohosytes
		Up	Down
	JeKo-1-IR vs. JeKo-1	569	592
	JeKo-1 sgCDK5 (OE) vs. JeKo-1 sgNT	143	88
	JeKo-1-IR CDK5KD vs. JeKo-1-IR	148	227
